# Supplementary material for: Effects of Axonal Demyelination, Inflammatory Cytokines and Divalent Cation Chelators on Thalamic HCN Channels and Oscillatory Bursting
Source: MDPI journal article supplement (doi:10.3390/ijms23116285), 2022-06-03
Supplement: s1 [file s1]

## SUPPLEMENTARY DATA

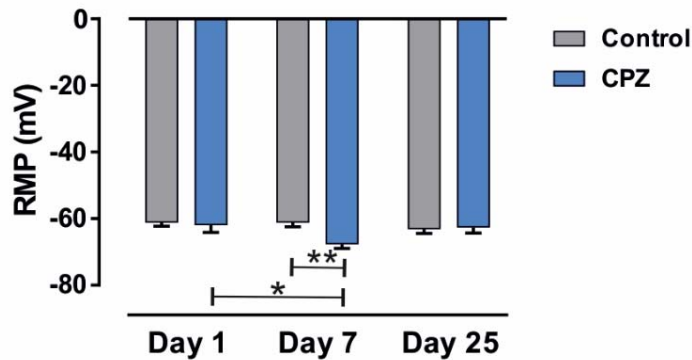

**Supplementary Figure S1: Impact of CPZ-induced de- and remyelination on the resting membrane potential (RMP) of the thalamic neurons.** Bar graphs displaying the resting membrane potential for CPZ-treated mice (blue) after 1, 7, 25 days of remyelination and their aged matched controls (grey) for each remyelination period.

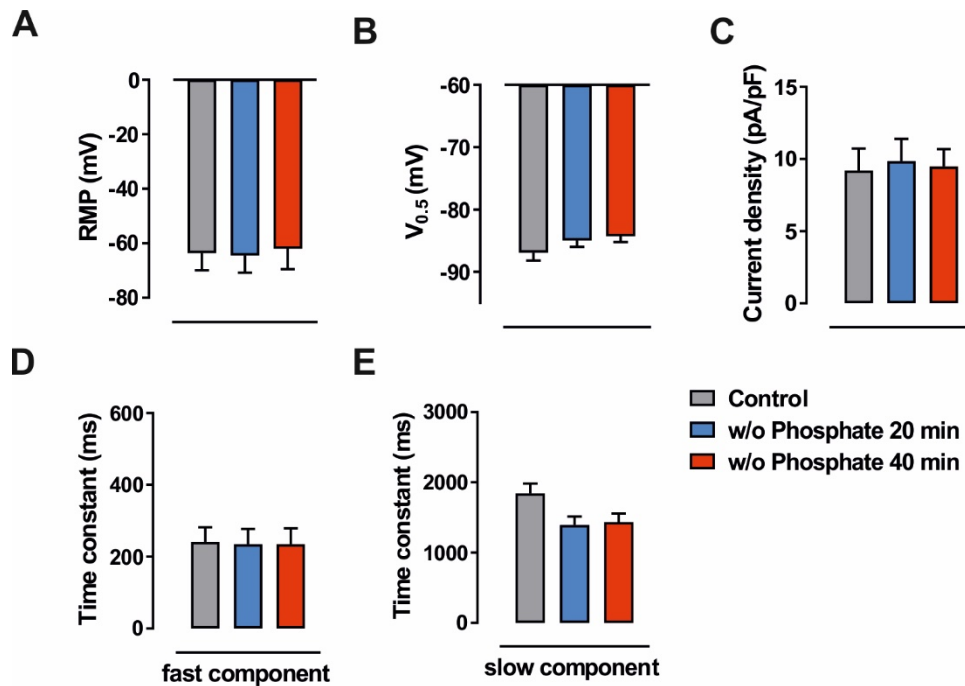

**Supplementary Figure S2: Impact of nominally phosphate-free ACSF on  $I_h$  current recorded from VB TC neurons.** (A-E) Bar graphs showing the resting membrane potential (A),  $V_{0.5}$  (B), current density (C), fast (D) and slow (E) activation kinetics of  $I_h$  current recorded from VB TC neurons under control condition (grey), after 20 min (blue) and 40 min (red) wash-in of nominally phosphate-free ACSF.

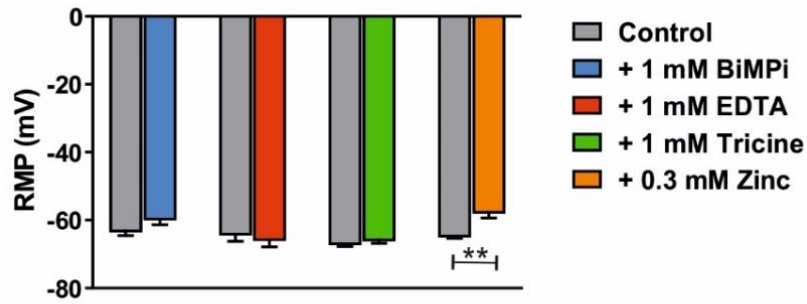

**Supplementary Figure S3: Effects of divalent cation chelators and trace metals on the resting membrane potential (RMP) of the thalamic neurons.** Bar graphs comparing the RMP in control and experimental conditions (as indicated).

**Supplementary Table S1: Effects of CPZ on  $I_h$  current recorded in oocytes expressing hHCN4 channels.** Mean current amplitudes [nA  $\pm$  SEM] in presence of ND96 + 0.2 % DMSO (ctrl) and 100  $\mu$ M CPZ (+CPZ). Mean amplitudes were derived from n independent oocytes.

|      | n  | Mean current amplitudes [nA] $\pm$ SEM |              |              |               |               |                |
|------|----|----------------------------------------|--------------|--------------|---------------|---------------|----------------|
|      |    | -40 mV                                 | -60 mV       | -80 mV       | -100 mV       | -120 mV       | -140 mV        |
| Ctrl | 11 | 18 $\pm$ 5                             | -25 $\pm$ 7  | -95 $\pm$ 14 | -256 $\pm$ 29 | -522 $\pm$ 63 | -907 $\pm$ 116 |
| +CPZ | 8  | 20 $\pm$ 11                            | -26 $\pm$ 17 | -94 $\pm$ 25 | -272 $\pm$ 43 | -576 $\pm$ 89 | -957 $\pm$ 159 |
